# Supplementary material for: Water dispersible electrically conductive poly(3,4-ethylenedioxythiophene) nanospindles by liquid crystalline template assisted polymerization
Source: Royal Society of Chemistry journal article supplement (doi:10.1039/c4tc01010h), 2014-01-01
Supplement: c4tc01010h1.pdf [file c4tc01010h1.pdf]

## Supporting information

### **Water dispersible electrically conductive poly (3, 4-ethylenedioxythiophene) nanospindles by liquid crystalline template assisted polymerization.**

Sudha J. Devaki<sup>a\*</sup>, Neethu K. Sadanandhan<sup>a</sup>, Renjith Sasi<sup>a</sup>, Hans-Juergen P. Adler<sup>c</sup>, Andrij Pich<sup>b\*</sup>

<sup>a</sup>Chemical Sciences and Technology Division, National Institute for Interdisciplinary Science and Technology (NIIST), CSIR, Thiruvananthapuram 695 019, India.

<sup>b</sup> Leibniz Institute of Interactive Materials, Functional and Interactive Polymers, RWTH Aachen University, D-52056 Aachen, Germany.

<sup>c</sup>Department of Macromolecular Chemistry and Textile Chemistry, University of Technology, Dresden, Germany.

#### **Synthesis of 4 hydroxy-2-pentadecyl benzene sulphonic acid (PDPSA)**

10 g of cardanol( 0.025 mole) was mixed with 5 ml conc. H<sub>2</sub>SO<sub>4</sub>( 0.092 mole) in a 100 ml round bottomed flask and magnetic stirred at 80 °C for 2 h and later 110 °C for 1 h. It was then dissolved in ice-cold water and washed with n- butanol and adjusted the pH to 7. Filtered, washed and then acidified to get the PDPSA. Further it was dried in a vacuum oven at 80 °C for 24 h. Color and appearance – colorless powder. Yield - 80%. Chemical structure of the PDPSA was characterized by elemental analysis, FT-IR and <sup>1</sup>H NMR. Mol. formula C<sub>21</sub>H<sub>39</sub>SO<sub>4</sub>. Elem. anal (observed C- 64.9 %, H- 10%, S 8.3%) calculated (C- 65.1% H- 10.07 %, S 8.2%).

In FTIR spectra, it exhibited peaks with  $\nu_{(\max)}$  2919, 2841, 1469 – (CH<sub>2</sub>)<sub>n</sub>, 1605, 694 (Ar), 1227 (CO), 1305, 1195 (SO) and 1032 cm<sup>-1</sup> (SO<sub>3</sub>).

In <sup>1</sup>H NMR (CDCl<sub>3</sub>, ppm),  $\delta$  -0.8-0.9 (3H, t, CH<sub>2</sub>-CH<sub>3</sub>), 1.25 (26H, bs, -CH<sub>2</sub>-)<sub>n</sub>, 2.8 (2H, t, Ph-CH<sub>2</sub>-) n, 5.7 (1H, bs, OH), 6.8-6.9 (3H, m, Ar), 7.0 (1H, d, ArC-5).

#### **Preparation and characterisation of liquid crystalline template of EDOT –PDPSA**

0.5 gm (1.3×10<sup>-4</sup> mole) of PDPSA was mixed with 0.02gm of EDOT (1.3×10<sup>-4</sup> mole) by heating and stirring in presence of 10 mL of doubly distilled water for 1 h at 60-70 °C and cooled at room temperature. Concentration of EDOT-PDPSA was adjusted in water and ethanol-water mixture (30-70%) for finding out the critical micelle concentration of the EDOT-PDPSA using UV-Vis spectroscopy. Later concentration of EDOT-PDPSA in the solution was increased to observe liquid crystalline phase formation and was monitored using a combination of techniques such as PLM and rheology.

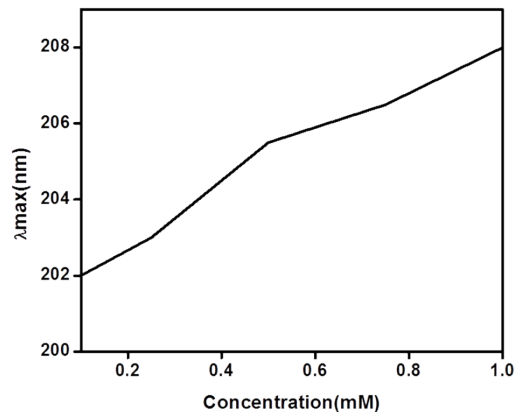

**Fig. S1.** UV-Vis absorbance vs. concentration of EDOT-PDPSA in water for evaluating CMC.

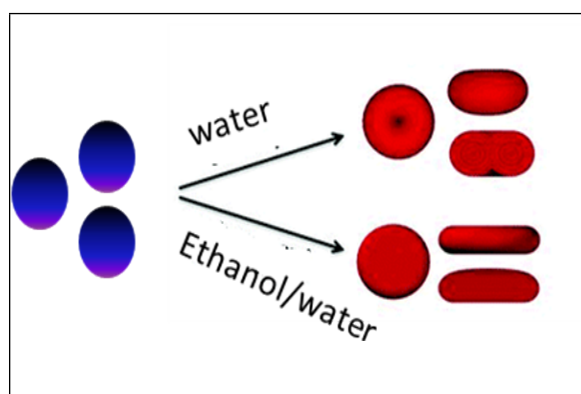

**Fig. S2.** Surface controlled conversion of microdiscs.

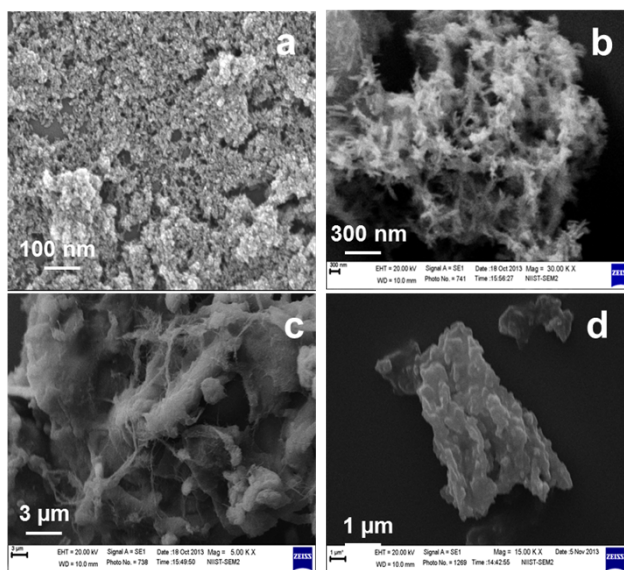

**Fig. S3.** SEM images of a) PEDOTS1, b) PEDOTS3, c) PEDOTS4 and d) PEDOT.

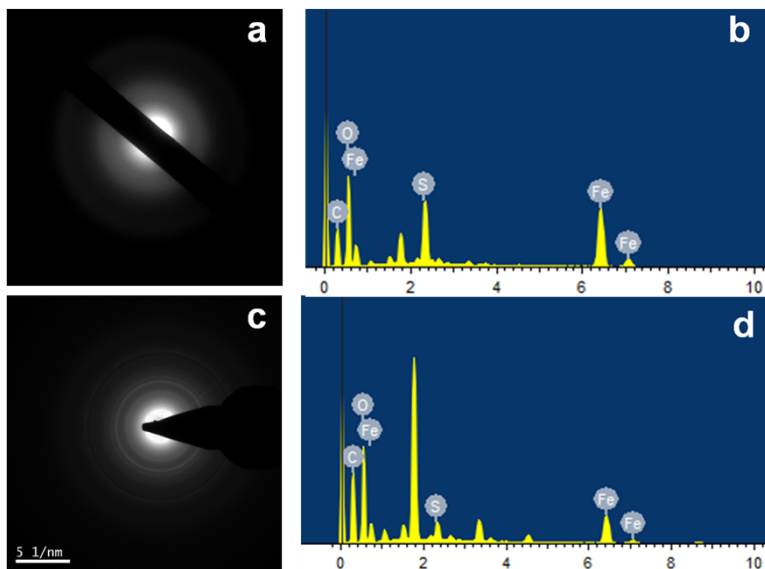

**Fig. S4.** a) SAED pattern of PEDOTS1, b) EDAX of PEDOTS1, c) SAED pattern of PEDOTS3 and d) EDAX of PEDOTS1.

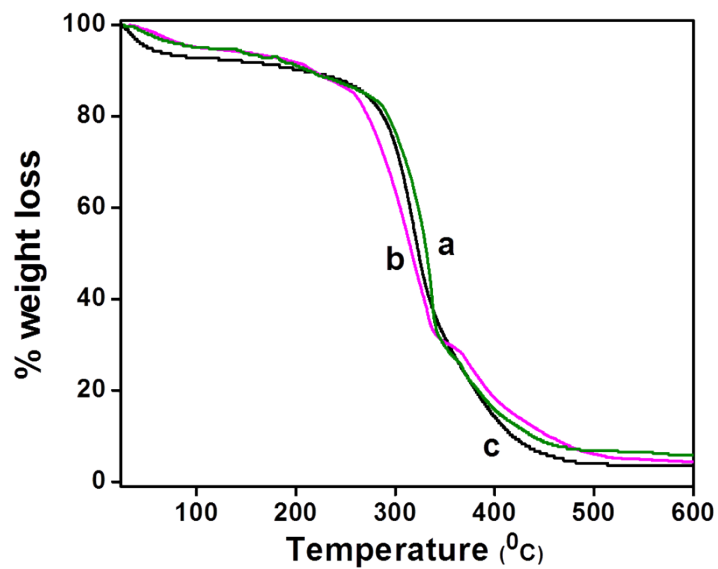

**Fig. S5.** Thermograms of a) PEDOTS1, b) PEDOTS3 and c) PEDOT

**Table S1.** Effect of shape of PEDOT particles on the electrical conductivity.

| Sl. No: | Morphology   | Conductivity (S/cm)  | Reference                                     |
|---------|--------------|----------------------|-----------------------------------------------|
| 1       | Films        | $5.4 \times 10^{-4}$ | Macromolecules 2012, 45, 599–601              |
| 2       | Nanorods     | $2 \times 10^{-1}$   | Chemical Physics Letters 394 (2004) 339–343   |
| 3       | Nanowires    | $7 \times 10^{-2}$   | <i>New J. Chem.</i> , 2014, 38, 1106--1115    |
| 4       | Nanospheres  | $1.1 \times 10^{-2}$ | Macromol. Res., Vol. 21, No. 6, 2013, 693-698 |
| 5       | Nanorings    | $1.1 \times 10^{-1}$ | J Polym Res (2010) 17:713–718                 |
| 6       | Nanospindles | $2.79 \times 10^0$   | Present work                                  |
